# Supplementary material for: Graphene oxide complex as a pH-sensitive antitumor drug
Source: Royal Society of Chemistry journal article supplement (doi:10.1039/c5py00047e), 2015-01-01
Supplement: c5py00047e1.pdf [file c5py00047e1.pdf]

## Supplementary Information

### Graphene oxide complex as pH-Sensitive antitumor drugs

Rumei Cheng,<sup>a</sup> Ruitao Zou,<sup>a</sup> Shengju Ou,<sup>c</sup> Rui Guo<sup>a</sup>, Ruiying Yan,<sup>a</sup> Haiyan Shi,<sup>a</sup> Shanshan Yu,<sup>a</sup> Xiaojian Li,<sup>a</sup> Yexu Bu,<sup>a</sup> Mimi Lin,<sup>a</sup> Yong Liu,<sup>a,\*</sup> and Liming Dai<sup>a,b,\*</sup>

<sup>a</sup>*Institute of Advanced Materials for Nano-Bio Applications, School of Ophthalmology & Optometry, Wenzhou Medical University, 270 Xueyuan Xi Road, Wenzhou, Zhejiang 325027, China*

<sup>b</sup>*Center of Advanced Science and Engineering for Carbon (Case4Carbon), Department of Macromolecular Science and Engineering, Case Western Reserve University, 10900 Euclid Avenue, Cleveland, Ohio 44106, United State*

<sup>c</sup>*Hangzhou Feipu Technology Co. Ltd., 525 Xixi Road, Hangzhou, Zhejiang 310023, China*

\*Emails: yongliu1980@hotmail.com, liming.dai@case.edu

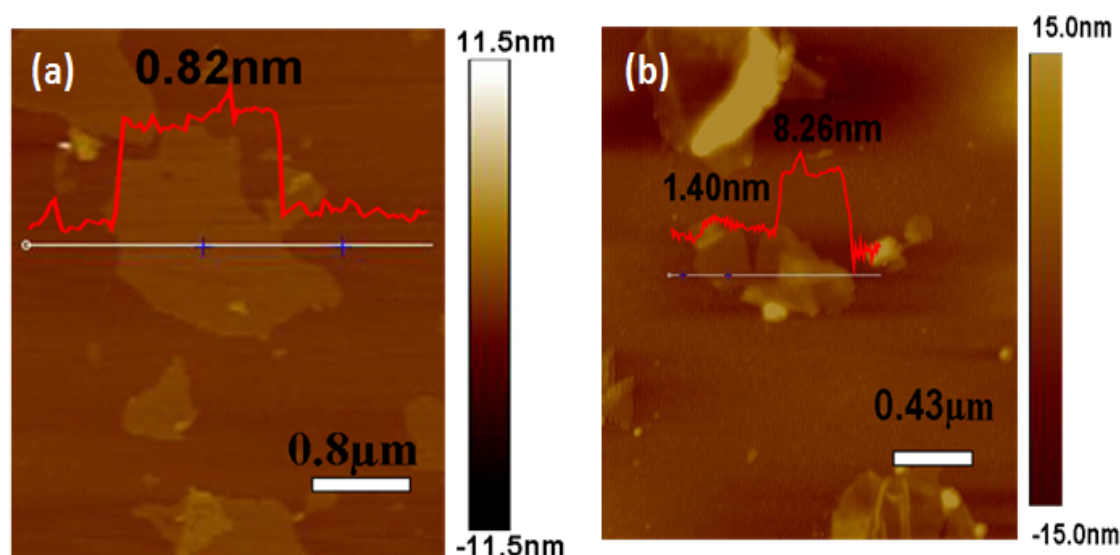

Fig. S1 AFM images of (a) GO (a) and (b) GCS .

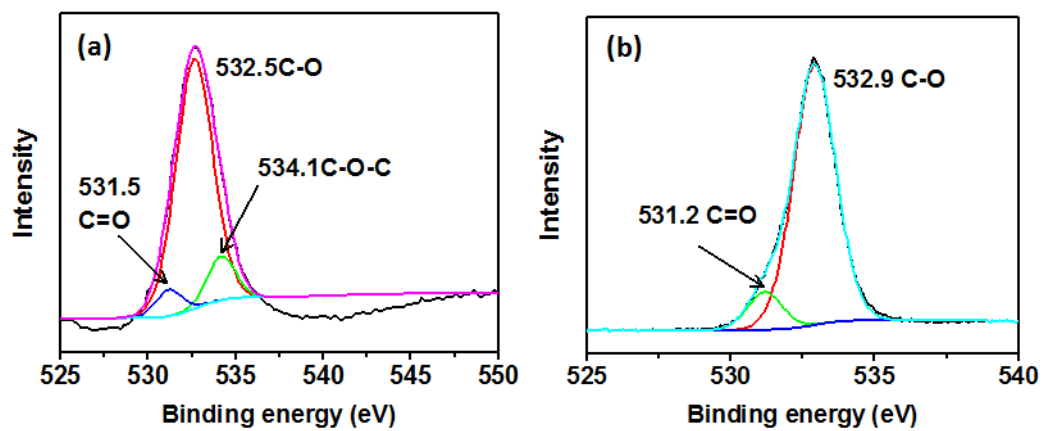

Fig. S2 High resolution XPS O 1s spectra of (a) GO (a) and (b) GCS.

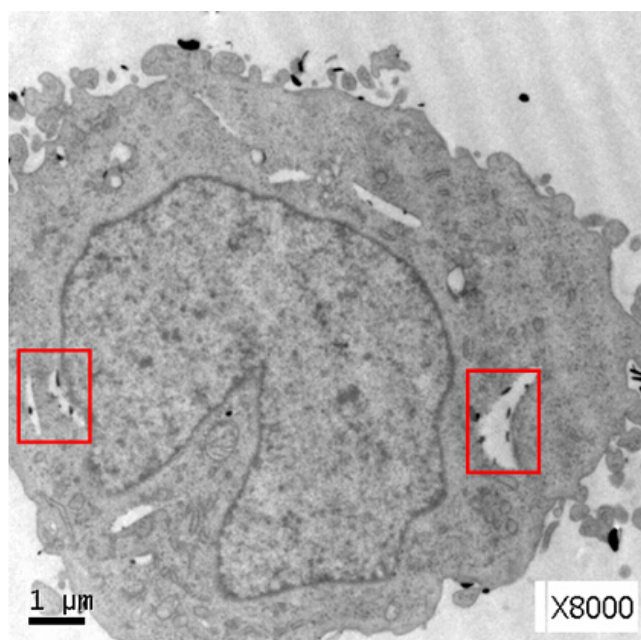

Fig. S3 TEM image of hela cells incubated with 100  $\mu\text{L}$  of GCS (10 mg/L) for 24 h.
